# Supplementary material for: Enhanced pollutant photodegradation activity of graphitic carbon nitride on via bismuth oxyhalide graphene hybridization and the mechanism study
Source: Royal Society of Chemistry journal article supplement (doi:10.1039/d4im00105b), 2024-09-24
Supplement: d4im00105b1.pdf [file d4im00105b1.pdf]

## Supporting Information

### **Enhanced pollutant photodegradation activity of graphitic carbon nitride on via bismuth oxyhalide graphene hybridization and the mechanism study**

Xinghui Liu,<sup>‡\*ab</sup> Yang Liu,<sup>‡ab</sup> Xiang Guo,<sup>\*b</sup> Bowen Tao,<sup>b</sup> Xu Ma,<sup>a</sup> Simin Cheng,<sup>a</sup> Ning Tian,<sup>a</sup> Gaihui Liu,<sup>a</sup> Qiao Wu,<sup>a</sup> Viet Q Bui,<sup>c</sup> Kuldeep K Saxena,<sup>d</sup> Sankar Ganesh Ramaraj,<sup>e</sup> Jianhui Liu,<sup>f</sup> Fuchun Zhang<sup>\*a</sup> and Yongfa Zhu<sup>\*g</sup>

<sup>a</sup> School of Physics and Electronic Information, Yan'an University, Yan'an 716000, China.

<sup>b</sup> Science and Technology on Aerospace Chemical Power Laboratory, Laboratory of Emergency Safety and Rescue Technology, Hubei Institute of Aerospace Chemotechnology, Xiangyang, 441003, China.

<sup>c</sup> Advanced Institute of Science and Technology, The University of Danang, 41 Le Duan, Danang, Vietnam.

<sup>d</sup> Division of Research and Development, Lovely Professional University, Phagwara, India.

<sup>e</sup> Department of Bioengineering, The University of Tokyo, 7-3-1 Hongo, Bunkyo-Ku, Tokyo, 113-8656, Japan.

<sup>f</sup> Department of Restorative Dentistry and Biomaterials Sciences, Harvard School of Dental Medicine Boston, Massachusetts United States of America; The Forsyth Institute Cambridge, Massachusetts United States of America

<sup>g</sup> Department of Chemistry, Beijing Key Laboratory for Analytical Methods and Instrumentation, Tsinghua University, Beijing 100084, China.

<sup>‡</sup> These authors contributed equally to this work.

\* Corresponding author

E-mail addresses:

(X. Liu) [liuxinghui119@gmail.com](mailto:liuxinghui119@gmail.com); (X. Guo) [guoxiang@casc42.cn](mailto:guoxiang@casc42.cn)

(F. Zhang); [yadxzfc@yau.edu.cn](mailto:yadxzfc@yau.edu.cn); (Y. Zhu) [zhuyf@tsinghua.edu.cn](mailto:zhuyf@tsinghua.edu.cn).

### Transient photocurrent test

Photocatalytic activity is closely related to the transfer and separation rate of photogenerated electron-hole pairs; therefore, the carrier separation behavior is often investigated through the transient photocurrent measurement. To explore the photocurrents of the four samples, the electrochemical measurements were performed with an electrochemical workstation using a four-electrode system at room temperature under simulated sunlight glowed from a 500 W Xe lamp.

### Band scheme confirmation

band gap energies ( $E_g$ ) about pure CN and BOB were calculated according to the following Kubelka- Munk formula:

$$\alpha h\nu = A(h\nu - E_g)^{1/2}$$

(Equation S1)

where  $\alpha$ ,  $h$ ,  $\nu$  and  $A$  are the absorption coefficient, Planck's constant, the optical coefficient frequency and the proportionality constant<sup>1-3</sup>.

### The proposed reaction pathway for CN-BOB.

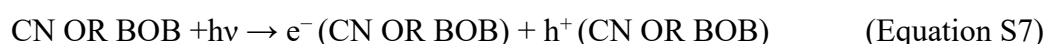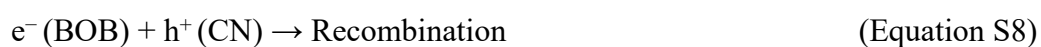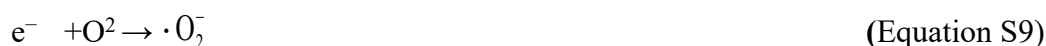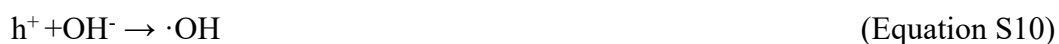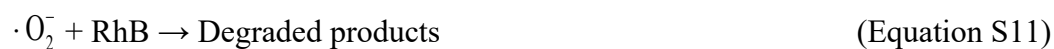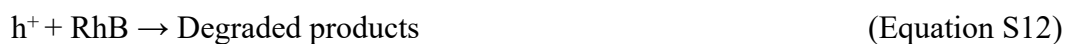

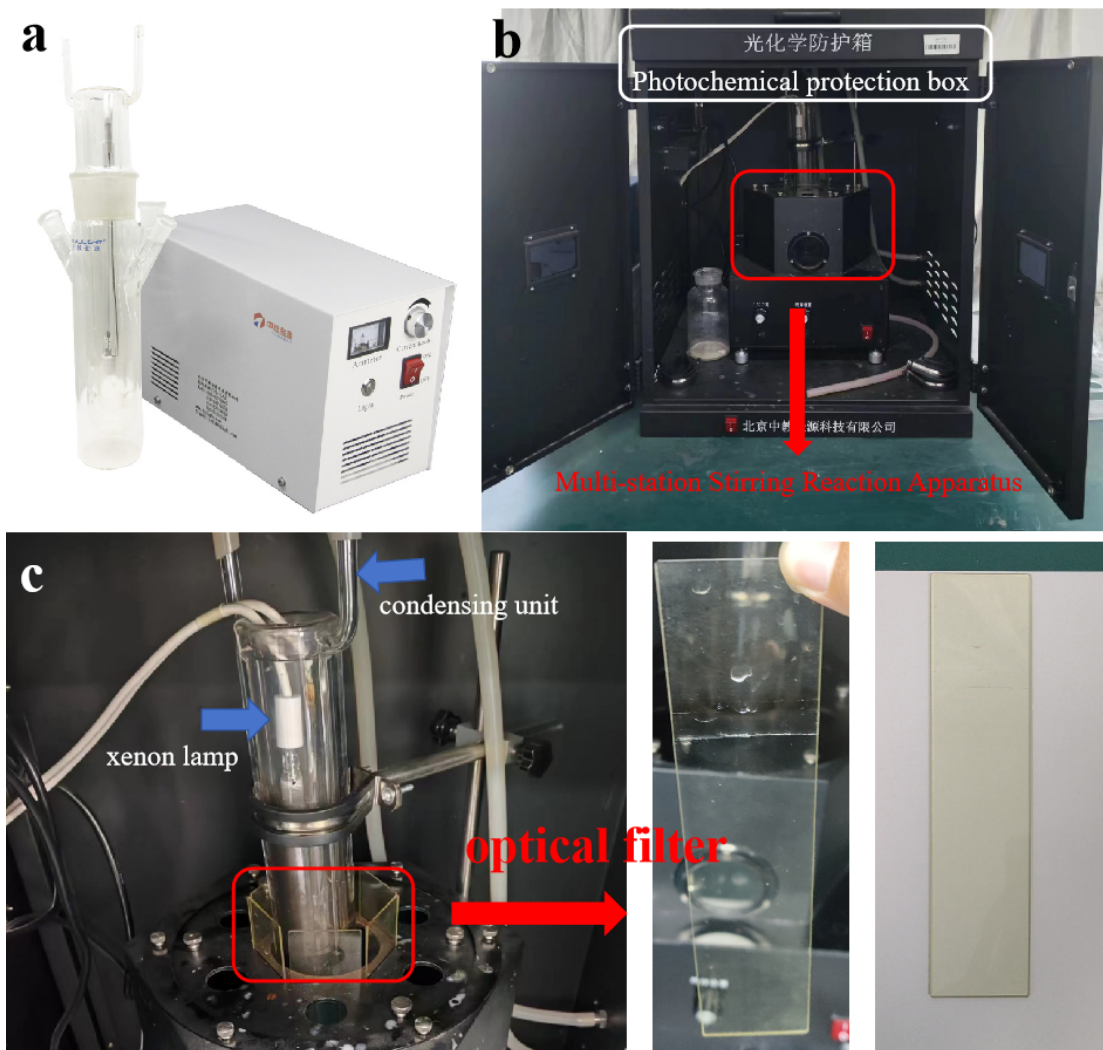

**Fig. S1** (a) a is the CEL-LAX500 long arc xenon lamp, (b) the photocatalytic reaction device, and (c) a partial enlargement of the photocatalytic reaction dark box & visible light filter.

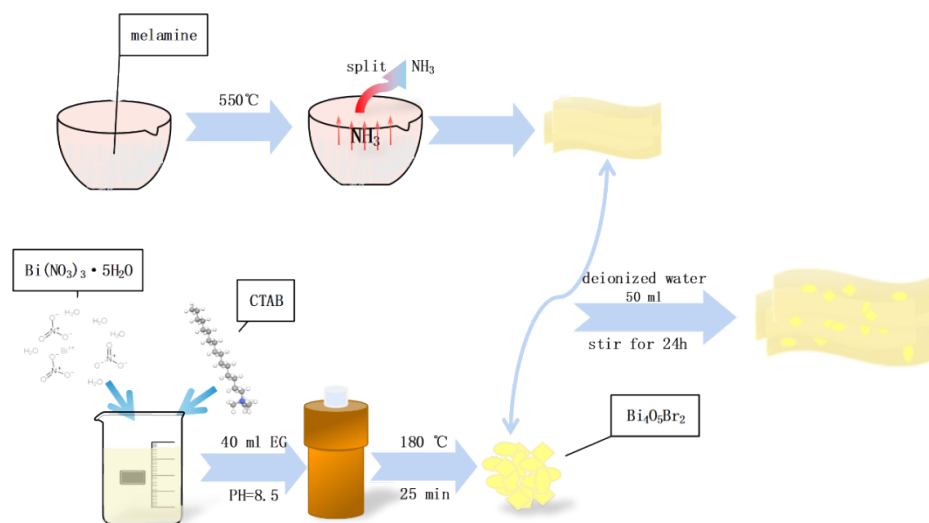

Fig. S2. synthesis procedure of  $g\text{-C}_3\text{N}_4/\text{Bi}_4\text{O}_5\text{Br}_2$ .

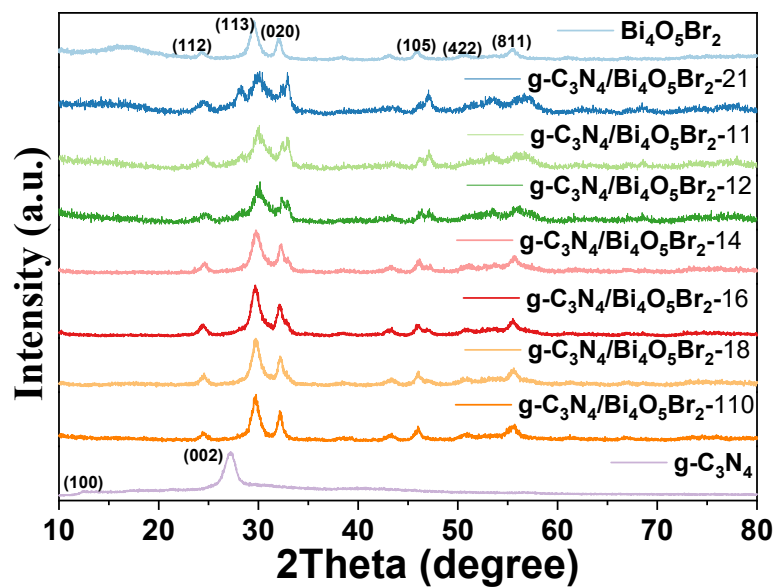

Fig. S3. XRD patterns for  $g\text{-C}_3\text{N}_4$ ,  $\text{Bi}_4\text{O}_5\text{Br}_2$ , and various  $g\text{-C}_3\text{N}_4/\text{Bi}_4\text{O}_5\text{Br}_2\text{-XY}$ .

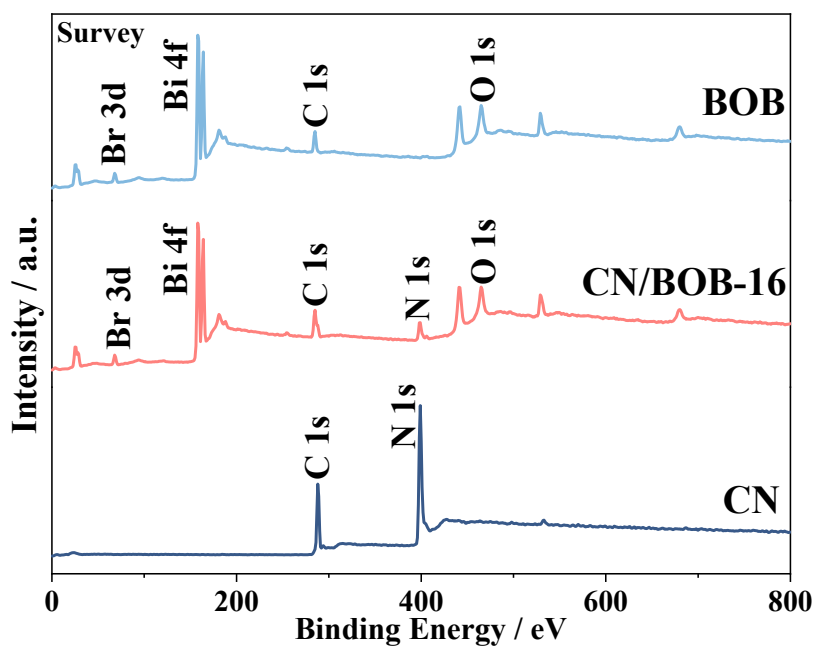

**Fig. S4.** XPS spectra survey.

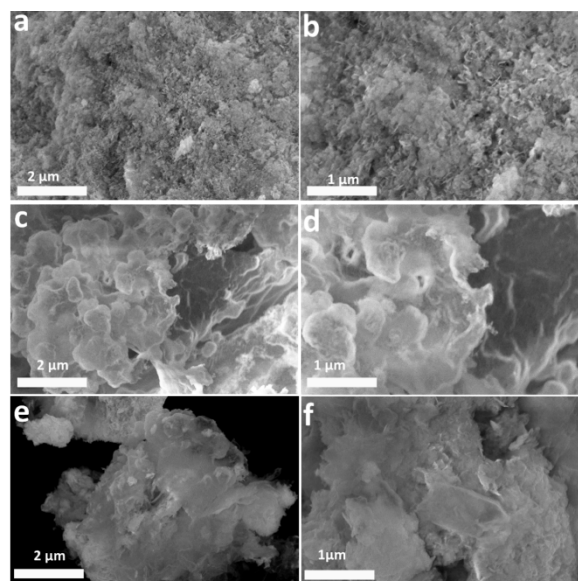

**Fig. S5.** SEM images. (a, b)  $\text{Bi}_4\text{O}_5\text{Br}_2$ , (c, d)  $\text{g-C}_3\text{N}_4$ , (e, f) CN/BOB-16 heterojunction.

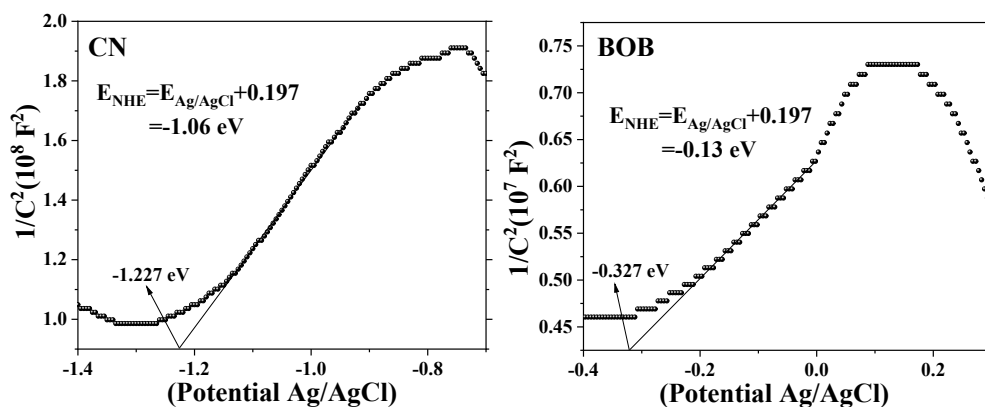

**Fig. S6.** Mott-Schottky curves of CN and BOB. Electrolyte properties:  $\text{Na}_2\text{SO}_4$ . The working electrode was prepared by dip-coating a photocatalyst slurry on an ITO glass electrode ( $2.0 \times 4.0 \text{ cm}^2$ ). Mott-Schottky plots were collected at a scan rate of  $5 \text{ mV s}^{-1}$ . The counter electrode was an Ag/AgCl electrode, and the results and calculated equations after converting it to NHE are shown in Figure.

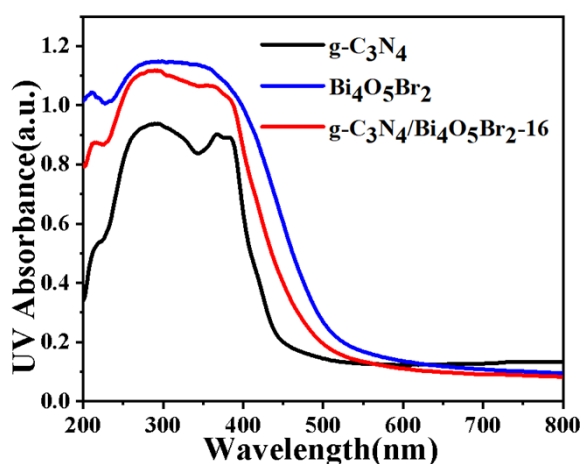

**Fig. S7.** UV-Vis DRS spectra.

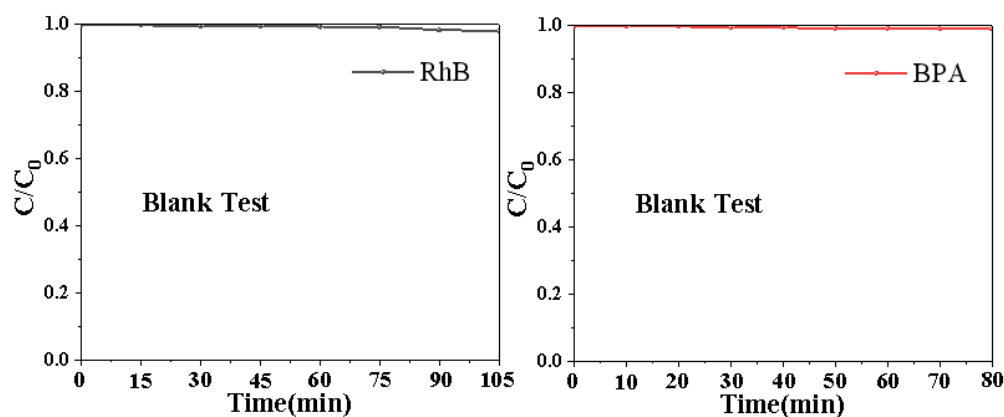

**Fig. S8.** The blank test with the light only.

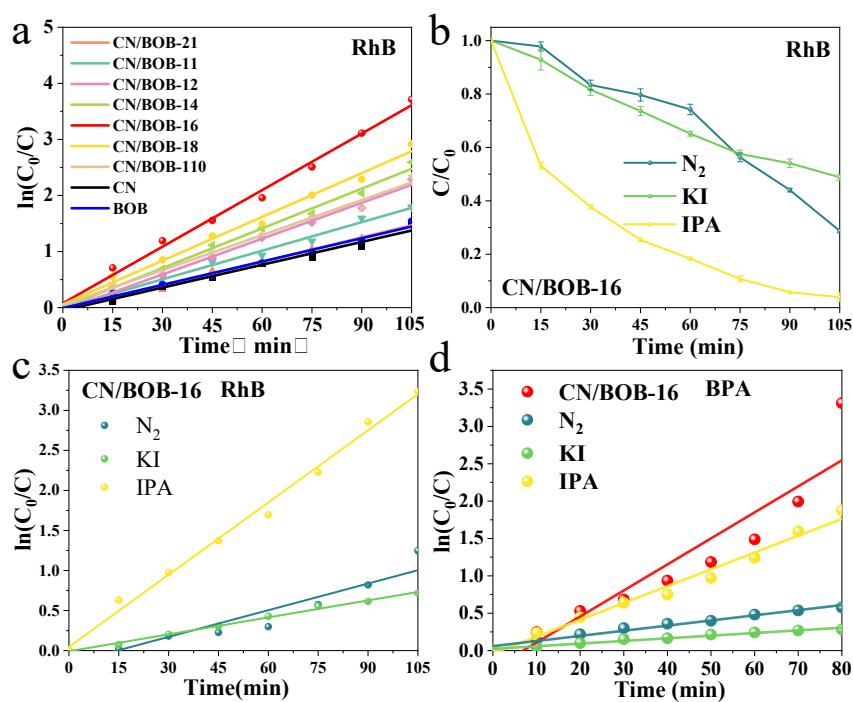

**Fig. S9.** (a) Pseudo-first-order kinetic curve of CN, BOB, CN/BOB-21, CN/BOB-11, CN/BOB-12, CN/BOB-14, CN/BOB-16, CN/BOB-18 and CN/BOB-110. (b) Assessment of active species through free radical scavenging degradation experiments. (c) Pseudo-primary kinetic profile of RhB degradation by CN/BOB-16. (d) Pseudo-primary kinetic profile of BPA degradation by CN/BOB-16.

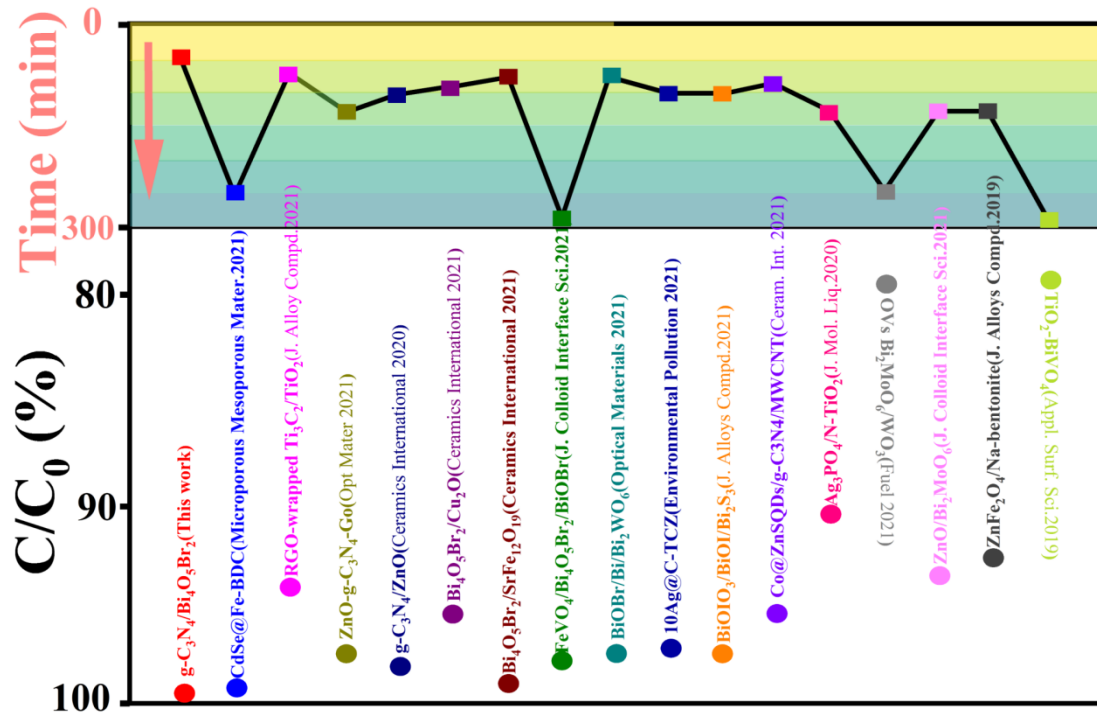

Fig. S10. Comparison of photocatalytic degradation performance using the literature images.

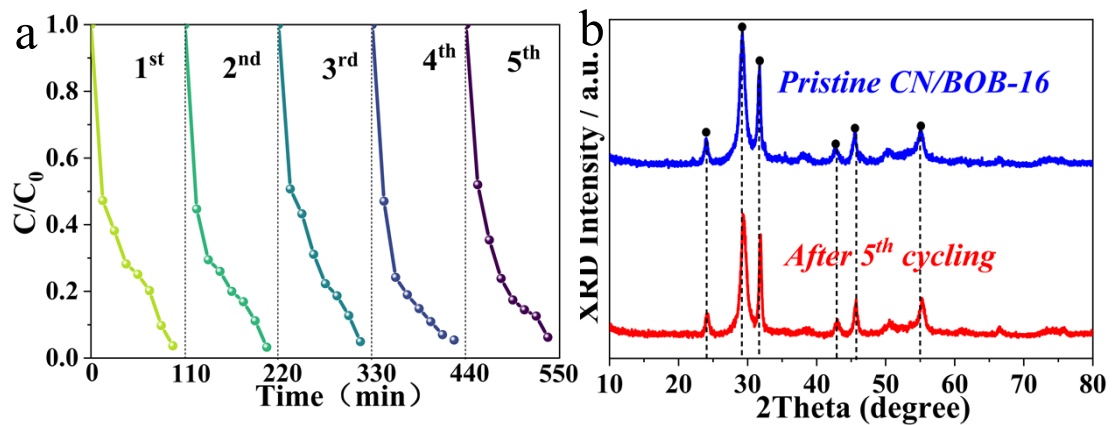

Fig. S11. (a) Recycling ability evaluation for five cycles. (b) XRD patterns of the CN/BOB-16 before and after the photocatalytic degradation experiment.



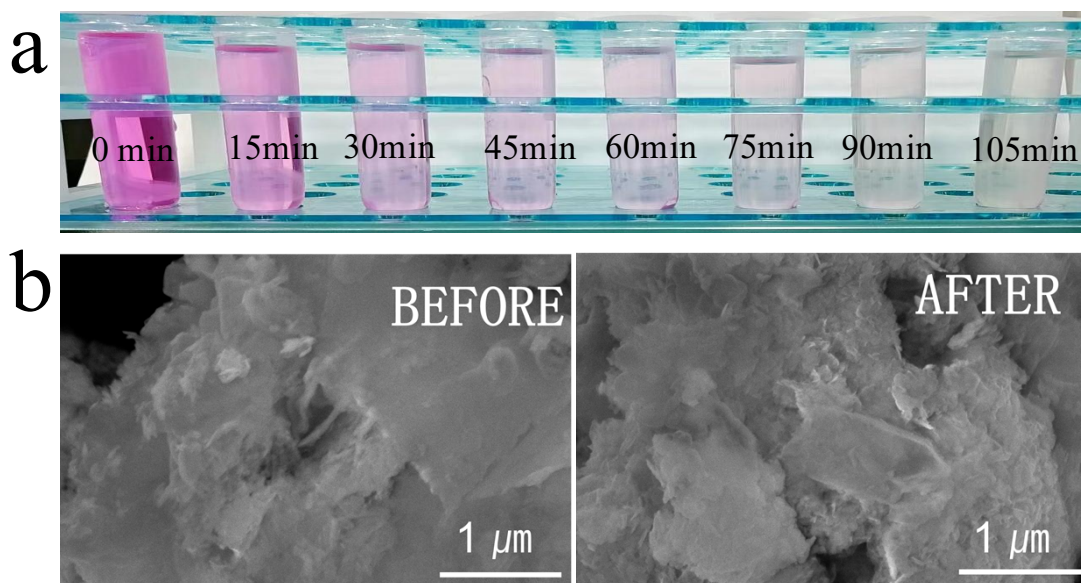

**Fig. S12.** (a) Photograph of the dye solvents for the 5<sup>th</sup> cycle. (b) SEM images of the CN/BOB-16 before and after the photocatalytic degradation experiment.

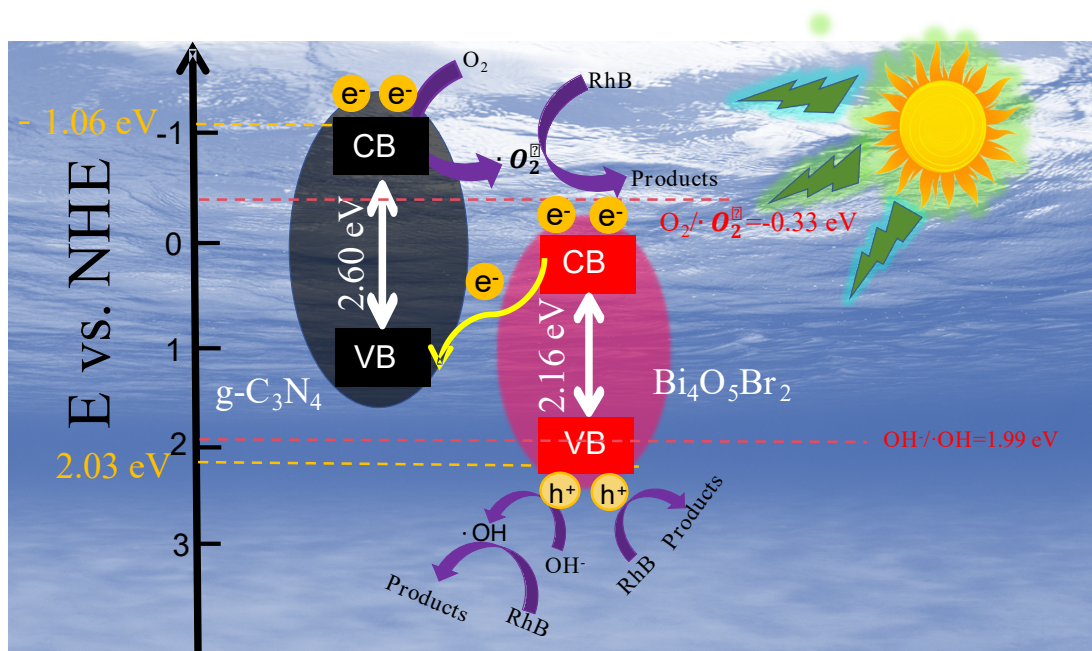

**Fig. S13. Mechanism analysis of photocatalytic degradation:** Proposed mechanism for the  $g\text{-C}_3\text{N}_4/\text{Bi}_4\text{O}_5\text{Br}_2$  heterojunction.

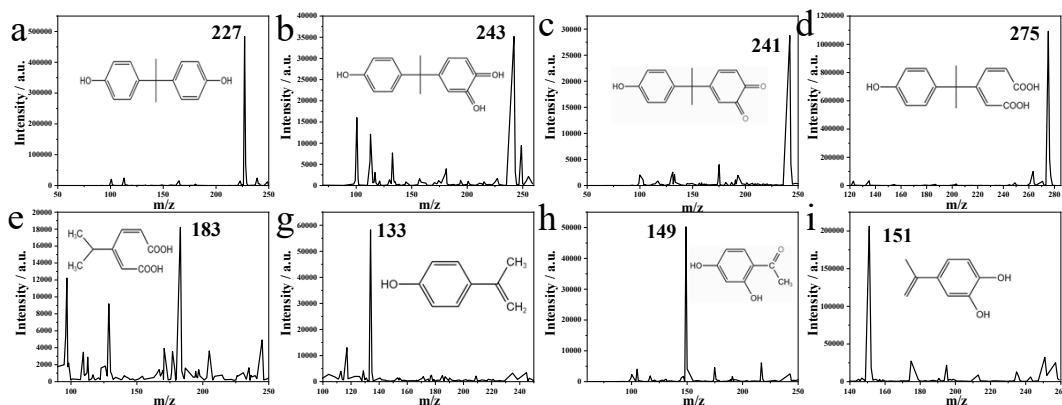

**Fig. S14.** HPLC-MS analysis conditions of the organic contaminants. (BPA)

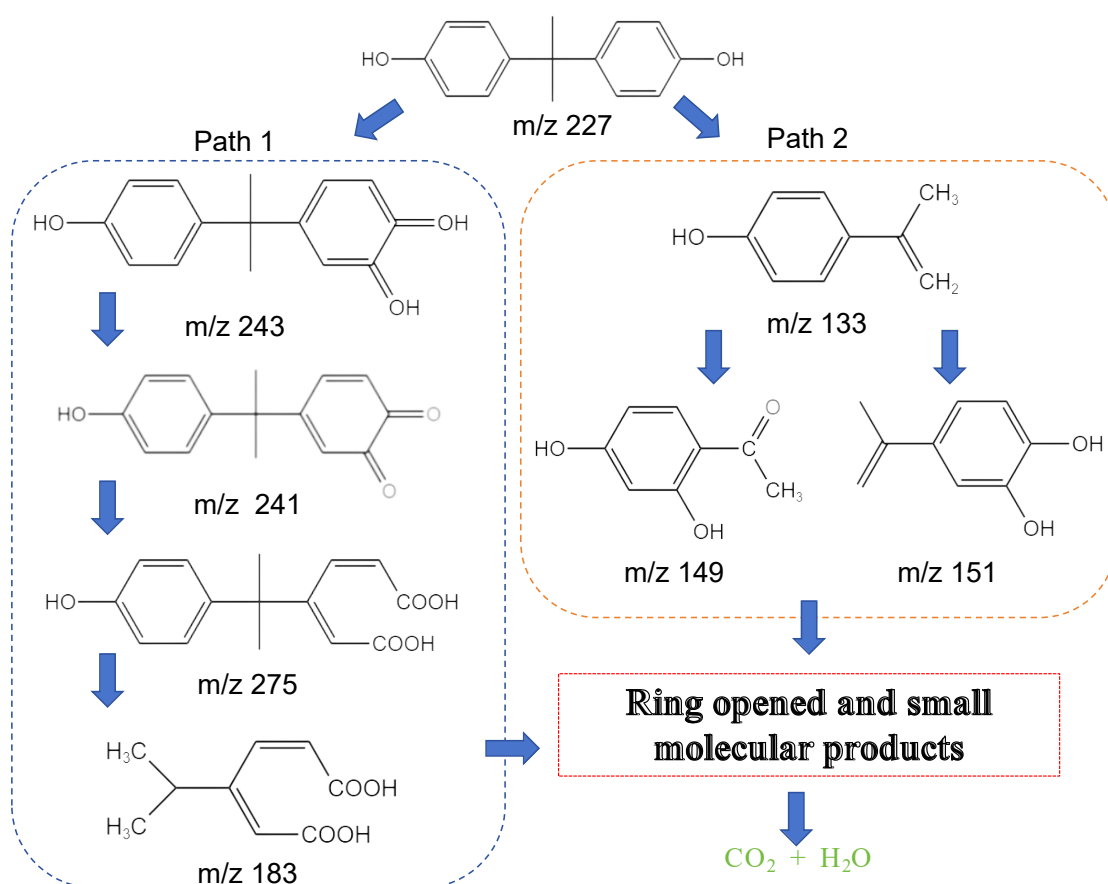

**Fig. S15.** Possible degradation pathways of BPA. In **Path 1**, hydroxylation was the first step of BPA photoconversion<sup>6, 7</sup>, and the aromatic ring was then attacked by  $\cdot\text{O}_2^-$  to form mono-hydroxylated BPA  $m/z = 243$ . Undergone the subsequent dehydration and ring-opening reactions, the corresponding quinone and carboxylic acid compounds  $m/z = 241$  and  $m/z = 275$  were produced<sup>8</sup>. Due to the instability of hydroxylated BPA, ring-opening reactions may occur on  $m/z = 243$  and  $m/z = 241$  under the attack of the active substance to form the product  $m/z = 183$ <sup>9</sup>. In **Path 2**, two phenolic hydroxyl groups in BPA as electron donors increase the electron density of the aromatic ring, which makes the electron-rich CAC connecting the two aromatic rings vulnerable to

the attack of the active species, leading to the form products  $m/z = 133$ , and  $m/z = 133$  further becomes  $m/z = 149$  and  $m/z = 151^{10}$ . In the late stage of the reaction, the above-mentioned products are subjected to ring-opening reaction under the continuous attack of the free radicals to generate small molecular products, which are finally converted into  $\text{CO}_2$  and  $\text{H}_2\text{O}$ .

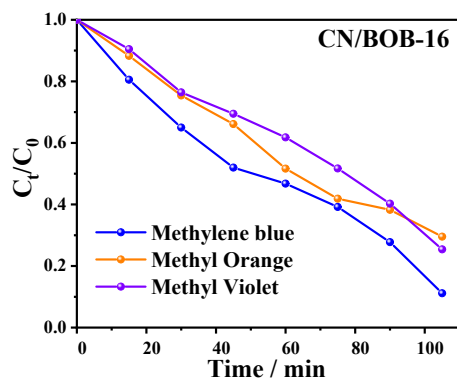

**Fig. S16.** Degradation properties for the other three dyes: methyl blue (90%), methyl orange (71%), and methyl violet (75%).

**Table S1.** The fitting parameter for the pseudo-first-order kinetic curve. (RhB)

| Sampl<br>es | CN/BO<br>B-21          | CN/BO<br>B-11          | CN/BO<br>B-21          | CN/BO<br>B-14          | CN/BO<br>B-16          | CN/BOB<br>-18          | CN/BO<br>B-110         | CN                          | BOB                         |
|-------------|------------------------|------------------------|------------------------|------------------------|------------------------|------------------------|------------------------|-----------------------------|-----------------------------|
| Slopes      | $0.043 \pm$<br>$0.001$ | $0.050 \pm$<br>$0.001$ | $0.063 \pm$<br>$0.001$ | $0.070 \pm$<br>$0.002$ | $0.101 \pm$<br>$0.003$ | $0.078 \pm$<br>$0.003$ | $0.062 \pm$<br>$0.002$ | $0.040$<br>$\pm$<br>$0.002$ | $0.041$<br>$\pm$<br>$0.001$ |
|             | $r^2$                  | 0.993                  | 0.989                  | 0.993                  | 0.992                  | 0.992                  | 0.988                  | 0.989                       | 0.980 0.987                 |

**Table S2.** Fitting parameters for the proposed first-order kinetic curve for free radical trapping.

| Sampl<br>es | CN/BO<br>B-16          | $\text{N}_2$ | KI         | IPA        | RhB        | $\text{N}_2$ | KI         | IPA     |
|-------------|------------------------|--------------|------------|------------|------------|--------------|------------|---------|
| Slopes      | $0.034 \pm$<br>$0.004$ | $0.022$      | $0.006$    | $0.003$    |            | $0.011$      | $0.007$    | $0.030$ |
|             |                        | $\pm 0.00$   | $\pm 0.00$ | $\pm 0.00$ | $\pm 0.00$ | $\pm 0.00$   | $\pm 0.00$ |         |
| $r^2$       | 0.879                  | 0.983        | 0.976      | 0.973      | 0.941      | 0.997        | 0.996      |         |

**Table S3.** (BPA and RhB) Total organic carbon removal rate of CN/BOB-16.

| Sample(Time) | TOC ( $\text{mg L}^{-1}$ ) | Removal Rate |
|--------------|----------------------------|--------------|
| BPA (0)      | 16.5                       | -            |
| BPA (80)     | 3.5                        | 78.8%        |
| RhB (0)      | 17.8                       | -            |

**Table S4.** Comparisons of RhB photocatalytic degradation between the prepared composite and some previous reported photocatalysts.

| Samples                                                                              | Light source                               | RhB<br>Conc(mg/<br>L) | Time(min<br>)    | Removal<br>efficiency<br>(%) | Ref                         |
|--------------------------------------------------------------------------------------|--------------------------------------------|-----------------------|------------------|------------------------------|-----------------------------|
| <b><i>g-C<sub>3</sub>N<sub>4</sub>/Bi<sub>4</sub>O<sub>5</sub>Br<sub>2</sub></i></b> | <b><i>500 W Xenon<br/>lamp</i></b>         | <b><i>10</i></b>      | <b><i>35</i></b> | <b><i>100</i></b>            | <b><i>This<br/>work</i></b> |
| CdSe QDs@ Fe-based<br>metal organic framework                                        | 250 W<br>Sodium lamp                       | 50                    | 240              | 99.8                         | 11                          |
| RGO-wrapped<br>Ti <sub>3</sub> C <sub>2</sub> /TiO <sub>2</sub>                      | 300 W Xenon<br>lamp                        | 10                    | 60               | 94.6                         | 12                          |
| ZnO-g-C <sub>3</sub> N <sub>4</sub> -GO                                              | 350 W Xenon<br>lamp                        | 10                    | 120              | 98                           | 13                          |
| g-C <sub>3</sub> N <sub>4</sub> /ZnO                                                 | 300 W Xenon<br>lamp                        | 10                    | 90               | 98.5                         | 14                          |
| Bi <sub>4</sub> O <sub>5</sub> Br <sub>2</sub> /Cu <sub>2</sub> O                    | 300 W Xenon<br>lamp                        | 10                    | 80               | 96                           | 15                          |
| Bi <sub>4</sub> O <sub>5</sub> Br <sub>2</sub> /SrFe <sub>12</sub> O <sub>19</sub>   | 300 W Xenon<br>lamp                        | 10                    | 60               | 99.3                         | 16                          |
| FeVO <sub>4</sub> /Bi <sub>4</sub> O <sub>5</sub> Br <sub>2</sub> /BiOBr             | 50 W LED<br>lamp                           | 10                    | 360              | 98.2                         | 17                          |
| BiOBr/Bi/Bi <sub>2</sub> WO <sub>6</sub>                                             | 350 W Xe<br>lamp                           | 10                    | 60               | 98                           | 18                          |
| Ag NPs decorated C-<br>TiO <sub>2</sub> /Cd <sub>0.5</sub> Zn <sub>0.5</sub> S       | 500 W Xe<br>lamp                           | 7                     | 90               | 97.6                         | 19                          |
| BiOIO <sub>3</sub> /BiOI/Bi <sub>2</sub> S <sub>3</sub>                              | 500 W Xe<br>lamp                           | 10                    | 90               | 98                           | 20                          |
| Co@ZnSQDs/g-C <sub>3</sub> N <sub>4</sub><br>/MWCNT                                  | halogen lamp<br>500 W                      | 10                    | 75               | 96                           | 21                          |
| Ag <sub>3</sub> PO <sub>4</sub> /N-TiO <sub>2</sub>                                  | 150W Xe<br>lamp                            | 10                    | 120              | 91                           | 22                          |
| OVs Bi <sub>2</sub> MoO <sub>6</sub> /WO <sub>3</sub>                                | 300 W Xe<br>lamp                           | 10                    | 240              | 80                           | 23                          |
| ZnO/Bi <sub>2</sub> MoO <sub>6</sub>                                                 | 15 W<br>Panasonic<br>cool daylight<br>lamp | 10                    | 120              | 94                           | 24                          |
| ZnFe <sub>2</sub> O <sub>4</sub> /Na-bentonite                                       | 350 W Xenon<br>lamp                        | 10                    | 120              | 93                           | 25                          |

|                                     |             |    |     |      |    |
|-------------------------------------|-------------|----|-----|------|----|
| TiO <sub>2</sub> -BiVO <sub>4</sub> | 300 Xe lamp | 10 | 300 | 79.3 | 26 |
|-------------------------------------|-------------|----|-----|------|----|

## References

1. Chen, X.; Zhang, J.; Zeng, J. H.; Shi, Y. X.; Huang, G. Z.; Zhang, L. L.; Wang, H. B.; Kong, Z.; Xi, J. H.; Ji, Z. G., Novel 3D/2D heterojunction photocatalysts constructed by three-dimensional In<sub>2</sub>S<sub>3</sub> dandelions and ultrathin hexagonal SnS<sub>2</sub> nanosheets with excellent photocatalytic and photoelectrochemical activities. *Applied Surface Science* **2019**, *463*, 693-703.
2. Hu, M.; Yan, A. H.; Wang, X. Y.; Huang, F.; Cui, Q. P.; Li, F.; Huang, J., Hydrothermal method to prepare Ce-doped BiOBr nanoplates with enhanced carrier transfer and photocatalytic activity. *Materials Research Bulletin* **2019**, *116*, 89-97.
3. Jiao, H. P.; Yu, X.; Liu, Z. Q.; Kuang, P. Y.; Zhang, Y. M., One-pot synthesis of heterostructured Bi<sub>2</sub>S<sub>3</sub>/BiOBr microspheres with highly efficient visible light photocatalytic performance. *Rsc Advances* **2015**, *5* (21), 16239-16249.
4. Xu, T. H.; Zou, R. J.; Lei, X. F.; Qi, X. M.; Wu, Q.; Yao, W. F.; Xu, Q. J., New and stable g-C<sub>3</sub>N<sub>4</sub>/HAp composites as highly efficient photocatalysts for tetracycline fast degradation. *Applied Catalysis B-Environmental* **2019**, *245*, 662-671.
5. Zhao, Y. J.; Liu, Y.; Cao, J. J.; Wang, H.; Shao, M. W.; Huang, H.; Liu, Y.; Kang, Z. H., Efficient production of H<sub>2</sub>O<sub>2</sub> via two-channel pathway over ZIF-8/C<sub>3</sub>N<sub>4</sub> composite photocatalyst without any sacrificial agent. *Applied Catalysis B-Environmental* **2020**, *278*.
6. Wu, Z.; Shen, J.; Ma, N.; Li, Z.; Wu, M.; Xu, D.; Zhang, S.; Feng, W.; Zhu, Y., Bi<sub>4</sub>O<sub>5</sub>Br<sub>2</sub> nanosheets with vertical aligned facets for efficient visible-light-driven photodegradation of BPA. *Applied Catalysis B: Environmental* **2021**, *286*, 119937.
7. Zhang, H.; Zheng, Y.; Wang, X. C.; Zhang, Q.; Dzakpasu, M., Photochemical behavior of constructed wetlands-derived dissolved organic matter and its effects on Bisphenol A photodegradation in secondary treated wastewater. *Science of The Total Environment* **2022**, *845*, 157300.
8. Lai, J.; Jiang, X.; Zhao, M.; Cui, S.; Yang, J.; Li, Y., Thickness-dependent layered BiOIO<sub>3</sub> modified with carbon quantum dots for photodegradation of bisphenol A: Mechanism, pathways and DFT calculation. *Applied Catalysis B: Environmental* **2021**, *298*, 120622.
9. Xu, L.; Yang, L.; Johansson, E. M. J.; Wang, Y.; Jin, P., Photocatalytic activity and mechanism of bisphenol a removal over TiO<sub>2-x</sub>/rGO nanocomposite driven by visible light. *Chemical Engineering Journal* **2018**, *350*, 1043-1055.
10. Takdastan, A.; Kakavandi, B.; Azizi, M.; Golshan, M., Efficient activation of peroxymonosulfate by using ferri-ferrous oxide supported on carbon/UV/US system: A new approach into catalytic degradation of bisphenol A. *Chemical Engineering Journal* **2018**, *331*, 729-743.
11. Zhang, Y.; Li, G.; Guo, Q. Y., CdSe QDs@ Fe-based metal organic framework composites for improved photocatalytic RhB degradation under visible light. *Microporous Mesoporous Mat.* **2021**, *324*, 10.
12. Xu, C.; Yang, F.; Deng, B. J.; Che, S.; Yang, W.; Zhang, G.; Sun, Y. K.; Li, Y. F., RGO-wrapped Ti<sub>3</sub>C<sub>2</sub>/TiO<sub>2</sub> nanowires as a highly efficient photocatalyst for simultaneous reduction of Cr(VI) and degradation of RhB under visible light irradiation. *Journal of Alloys and Compounds* **2021**, *874*.
13. Zhang, J. Q.; Li, J.; Liu, X. Y., Ternary nanocomposite ZnO-g-C(3)N<sub>4</sub>-Go for enhanced photocatalytic degradation of RhB. *Optical Materials* **2021**, *119*.
14. Zhong, Q. D.; Lan, H. Y.; Zhang, M. M.; Zhu, H.; Bu, M., Preparation of heterostructure g-C<sub>3</sub>N<sub>4</sub>/ZnO nanorods for high photocatalytic activity on different pollutants (MB, RhB, Cr(VI) and eosin). *Ceramics International* **2020**, *46* (8), 12192-12199.

15. Liu, G.; Wang, Y.; Sun, Y. H.; He, J. X., Synthesis of hollow structured Bi<sub>4</sub>O<sub>5</sub>Br<sub>2</sub>/Cu<sub>2</sub>O P-N heterojunctions with large surface area for enhanced photocatalytic performance towards the degradation of organic dyes. *Ceramics International* **2021**, *47* (20), 28650-28658.
16. Wang, H. L.; Xu, L. J.; Wu, X.; Zhang, M. J., Eco-friendly synthesis of a novel magnetic Bi<sub>4</sub>O<sub>5</sub>Br<sub>2</sub>/SrFe<sub>12</sub>O<sub>19</sub> nanocomposite with excellent photocatalytic activity and recyclable performance. *Ceramics International* **2021**, *47* (6), 8300-8307.
17. Chachvalvutikul, A.; Luangwanta, T.; Kaowphong, S., Double Z-scheme FeVO<sub>4</sub>/Bi<sub>4</sub>O<sub>5</sub>Br<sub>2</sub>/BiOBr ternary heterojunction photocatalyst for simultaneous photocatalytic removal of hexavalent chromium and rhodamine B. *Journal of Colloid and Interface Science* **2021**, *603*, 738-757.
18. Chen, X. L.; Zhao, B. X.; Ma, J. X.; Liu, L. X.; Luo, H. D.; Wang, W. J., The BiOBr/Bi/Bi<sub>2</sub>WO<sub>6</sub> photocatalyst with SPR effect and Z-scheme heterojunction synergistically degraded RhB under visible light. *Optical Materials* **2021**, *122*.
19. Wang, Y. H.; Kang, C. L.; Li, X. Y.; Hu, Q.; Wang, C., Ag NPs decorated C-TiO<sub>2</sub>/Cd<sub>0.5</sub>Zn<sub>0.5</sub>S Z-scheme heterojunction for simultaneous RhB degradation and Cr(VI) reduction. *Environmental Pollution* **2021**, *286*.
20. Lu, M. L.; Xiao, X. Y.; Zeng, G. C., Bi<sub>2</sub>S<sub>3</sub> nanorods and BiOI nanosheets co-modified BiOI/O<sub>3</sub> nanosheets: An efficient vis-light response photocatalysts for RhB degradation. *Journal of Alloys and Compounds* **2021**, *885*.
21. Danish, M.; Muneer, M., Facile synthesis of highly efficient Co@ZnSQDs/g-C<sub>3</sub>N<sub>4</sub>/MWCNT nanocomposites and their photocatalytic potential for the degradation of RhB dye: Efficiency, degradation kinetics, and mechanism pathway. *Ceramics International* **2021**, *47* (9), 13043-13056.
22. Khalid, N. R.; Mazia, U.; Tahir, M. B.; Niaz, N. A.; Javid, M. A., Photocatalytic degradation of RhB from an aqueous solution using Ag<sub>3</sub>PO<sub>4</sub>/N-TiO<sub>2</sub> heterostructure. *Journal of Molecular Liquids* **2020**, *313*.
23. Zhang, Z. S.; Zhao, C. X.; Lin, S. L.; Li, H.; Feng, Y. L.; Gao, X., Oxygen vacancy modified Bi<sub>2</sub>MoO<sub>6</sub>/WO<sub>3</sub> electrode with enhanced photoelectrocatalytic degradation activity toward RhB. *Fuel* **2021**, *285*.
24. Chankhanittha, T.; Nanan, S., Visible-light-driven photocatalytic degradation of ofloxacin (OFL) antibiotic and Rhodamine B (RhB) dye by solvothermally grown ZnO/Bi<sub>2</sub>MoO<sub>6</sub> heterojunction. *Journal of Colloid and Interface Science* **2021**, *582*, 412-427.
25. Guo, Y. Q.; Guo, Y. D.; Tang, D. D.; Liu, Y. Y.; Wang, X. G.; Li, P.; Wang, G. H., Sol-gel synthesis of new ZnFe<sub>2</sub>O<sub>4</sub>/Na-bentonite composites for simultaneous oxidation of RhB and reduction of Cr(VI) under visible light irradiation. *Journal of Alloys and Compounds* **2019**, *781*, 1101-1109.
26. Wang, Y. Q.; Lu, N.; Luo, M.; Fan, L. Y.; Zhao, K.; Qu, J.; Guan, J. N.; Yuan, X., Enhancement mechanism of fiddlehead-shaped TiO<sub>2</sub>-BiVO<sub>4</sub> type II heterojunction in SPEC towards RhB degradation and detoxification. *Applied Surface Science* **2019**, *463*, 234-243.
